# Supplementary material for: RUNX1–Survivin Axis Is a Novel Therapeutic Target for Malignant Rhabdoid Tumors
Source: PubMed Central journal article supplement — Mol Cells. 2022 Dec 12;45(12):886–95. doi: 10.14348/molcells.2022.2031 (PMC9794559; doi:10.14348/molcells.2022.2031), 2022-12-12
Supplement: molce-45-12-886-supple1.pdf [file molce-45-12-886-supple1.pdf]

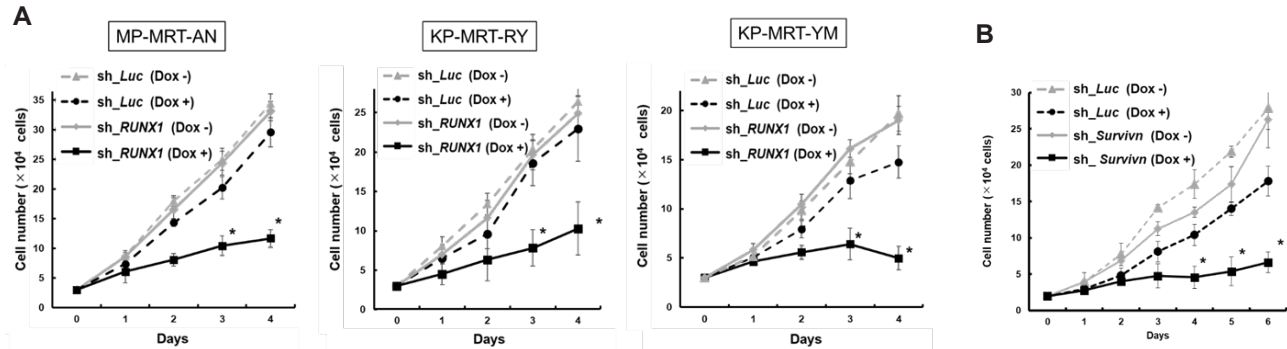

**Supplementary Fig. S1.** (A) Growth curves of MP-MRT-AN, KP-MRT-RY, and KP-MRT-YM cells transduced with the control (*sh\_Luc*) or runt-related transcription factor 1 (RUNX1) short hairpin RNAs (*sh\_RUNX1*). Cells were cultured with (Dox+) or without (Dox-) 3  $\mu$ M doxycycline ( $n = 3$ ). The effect of Dox administration was negligible. (B) Growth curves of MP-MRT-AN cells transduced with the control (*sh\_Luc*) or survivin shRNAs (*sh\_Survivin*). Cells were cultured with (Dox+) or without (Dox-) 3  $\mu$ M doxycycline ( $n = 3$ ). The effect of Dox administration was negligible. Data are represented as the mean  $\pm$  SEM. \* $P < 0.05$ , by two-tailed Student's *t*-test.

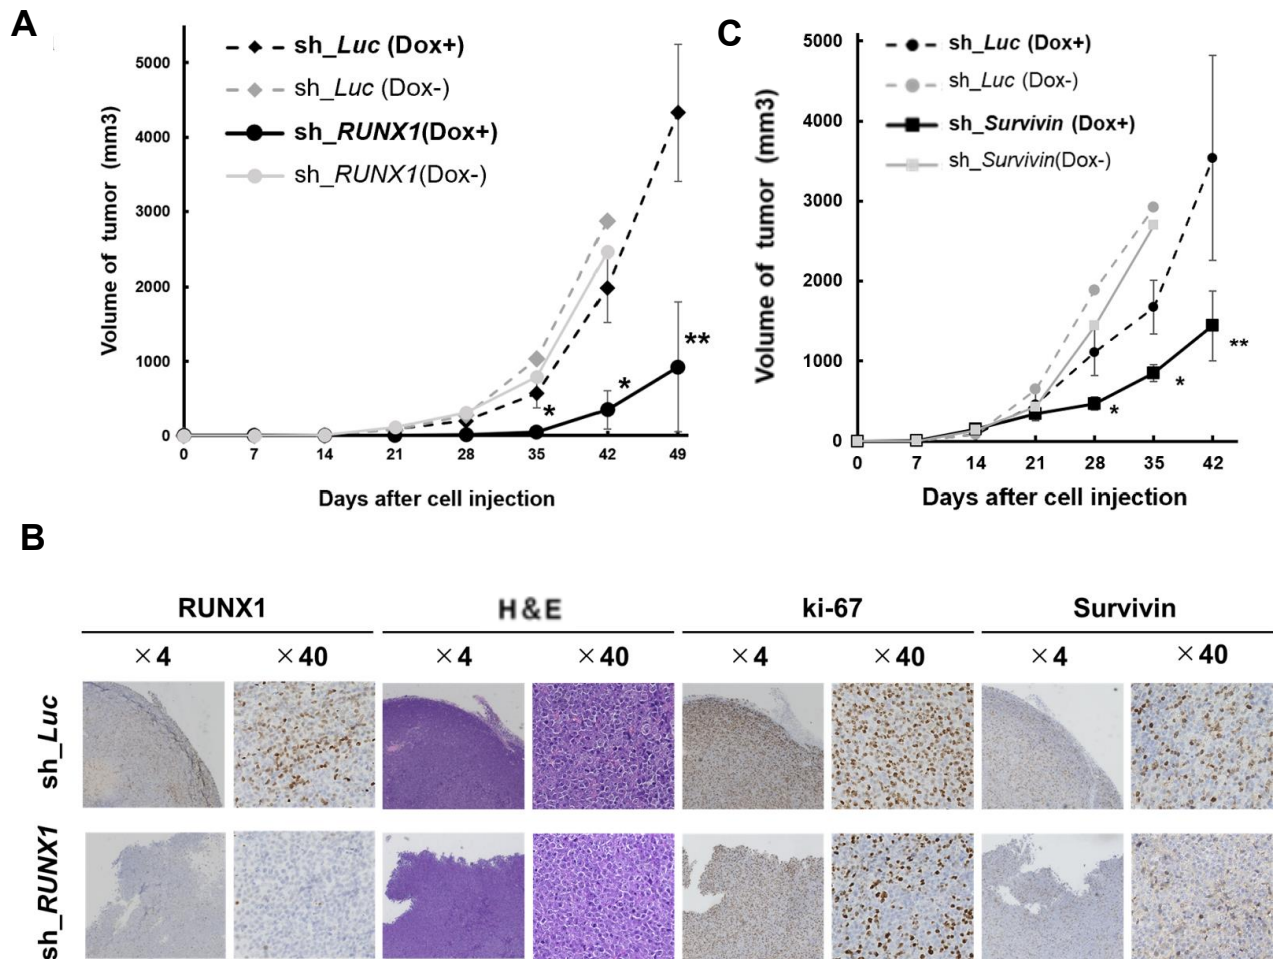

**Supplementary Fig. S2. RUNX1 knockdown suppresses malignant rhabdoid tumor (MRT) cell proliferation *in vivo*.** (A) Anti-tumor effects were examined by changes in the volume of xenograft tumor cells with knocked down RUNX1 by shRNA or transduced control. The effect of Dox administration was negligible (sh\_Luc [Dox-]: n = 1, sh\_RUNX1 [Dox-]: n = 1). (B) Representative microscopic images of tumor histology with knocked down RUNX1 by shRNA or transduced control. Results obtained from staining and immunohistochemical staining with anti-human RUNX1, H&E, ki-67, and anti-human survivin antibodies are shown (original magnification ×4 and ×40 [insets]). (C) Anti-tumor effects were examined by changes in the volume of xenograft tumor cells that knocked down survivin by shRNA or transduced control. The effect of Dox administration was negligible (sh\_Luc [Dox-]: n = 1, sh\_Survivin [Dox-]: n = 1). Data are represented as the mean ± SEM. \* $P < 0.05$ , \*\* $P < 0.01$ , by two-tailed Student's *t*-test.

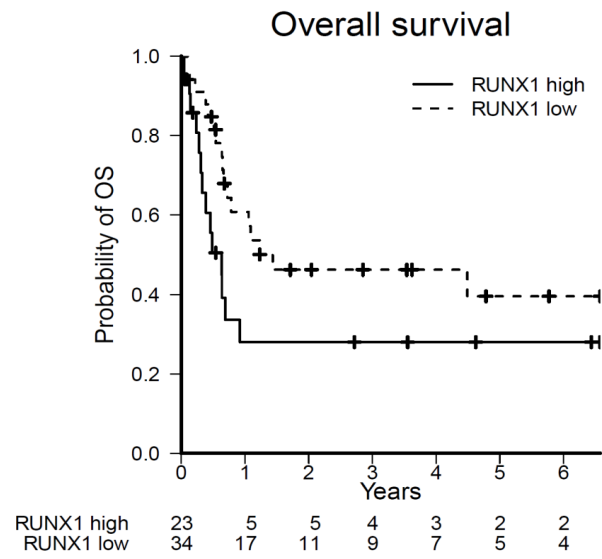

**Supplementary Fig. S3. Patients with high *RUNX1* expression were associated with a poorer prognosis than those with low-expression.** Kaplan-Meier curve of overall survival (OS) in the RUNX1-high and -low groups. The numbers of subjects with RUNX1-high and -low expression were  $n = 23$  and  $34$ , respectively.  $P = 0.07$ , log-rank test. Data were retrieved from the TARGET Rhabdoid Tumor Subproject (<https://ocg.cancer.gov/programs/target/projects/kidney-tumors>).

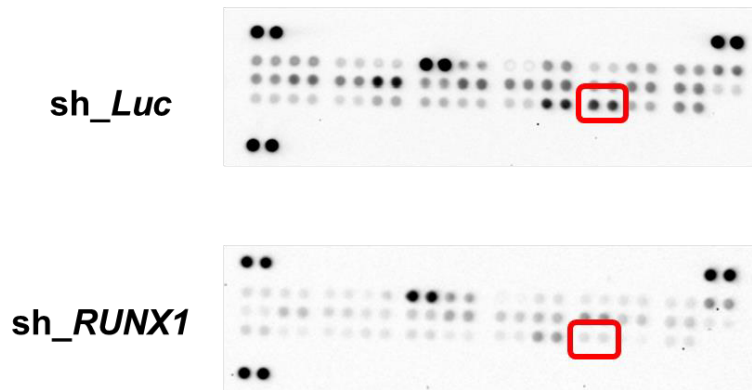

**Supplementary Fig. S4. Knockdown of RUNX1 markedly inhibits the levels of survivin.** Results of the human apoptosis array in MRT cells transduced with shRNA targeting *RUNX1* or control luciferase. A pair of spots indicates one of the apoptosis-related proteins, and the red rectangles indicate the spots of survivin.

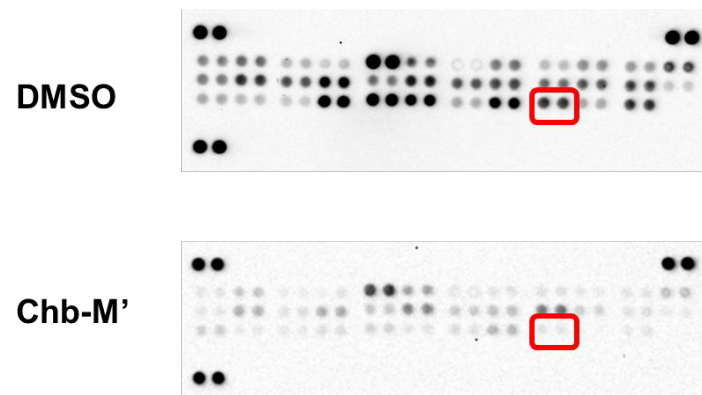

**Supplementary Fig. S5. Levels of survivin are markedly decreased in MRT cells treated with Chb-M'.** The result of the human apoptosis array in untreated (DMSO) and Chb-M'-treated MRT cells. The red rectangles indicate the spots of survivin.

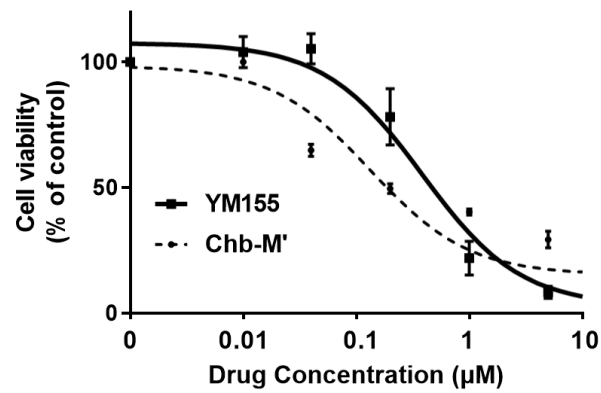

**Supplementary Fig. S6. Anti-tumor effect of Chb-M' is expected to be the same as YM155 in MRT cells.** Dose-response curves of Chb-M' and YM155 in KP-MRT-YM cells. The cells were treated with the indicated concentrations of Chb-M' or YM155. Forty-eight hours after treatment, cell viability was examined using a water-soluble tetrazolium salt (WST) assay (n = 3). Data are represented as the mean ± SEM.
